# Supplementary material for: Identification of indocyanine green as a STT3B inhibitor against mushroom α-amanitin cytotoxicity
Source: PubMed Central journal article supplement (PMC10188588; doi:10.1038/s41467-023-37714-3), 2023-05-16
Supplement: 41467_2023_37714_MOESM1_ESM.pdf [file 41467_2023_37714_MOESM1_ESM.pdf]

## **Supplementary Information**

**Identification of indocyanine green as a STT3B inhibitor against mushroom  $\alpha$ -amanitin cytotoxicity**

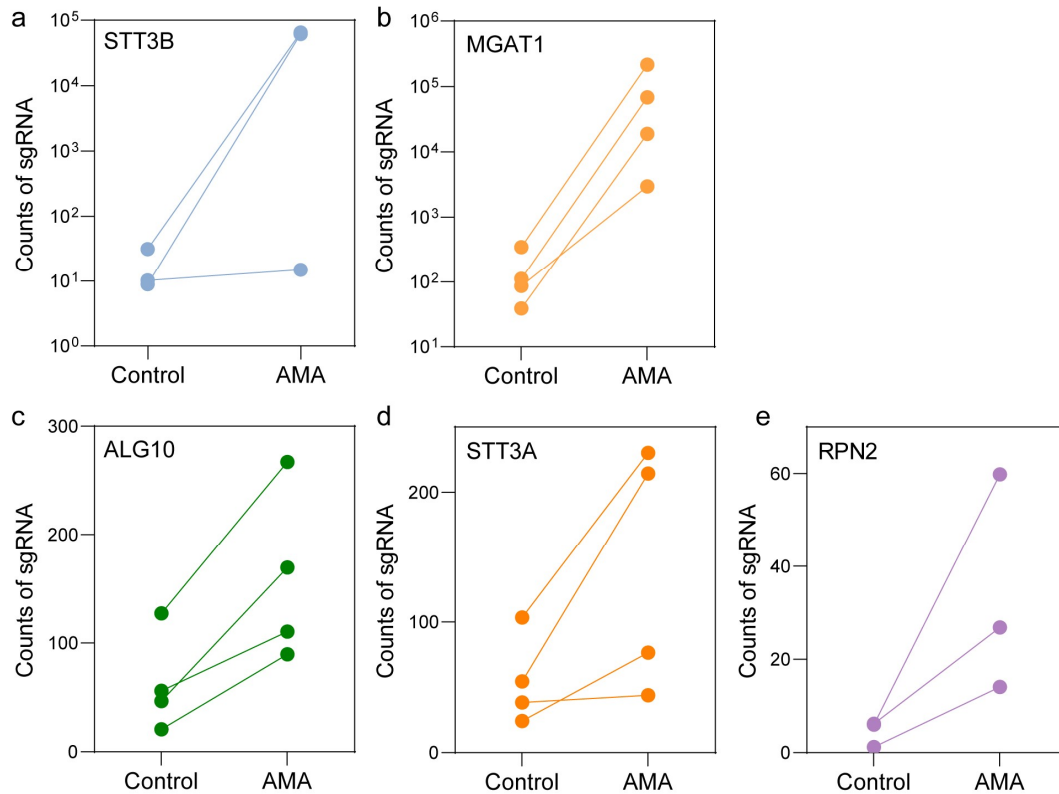

**Supplementary Figure 1. The gene hits from genome-wide CRISPR screen against AMA-induced cell death were enriched in the N-Glycan biosynthesis pathway. The counts of sgRNA of five significant genes, *STT3B*(a), *MGAT1*(b), *ALG10*(c), *STT3A*(d), and *RPN2*(e), on the N-Glycan biosynthesis pathway. The sgRNAs targeting the five genes were consistently enriched in AMA-treated cells. Source data are provided as a Source Data file.**

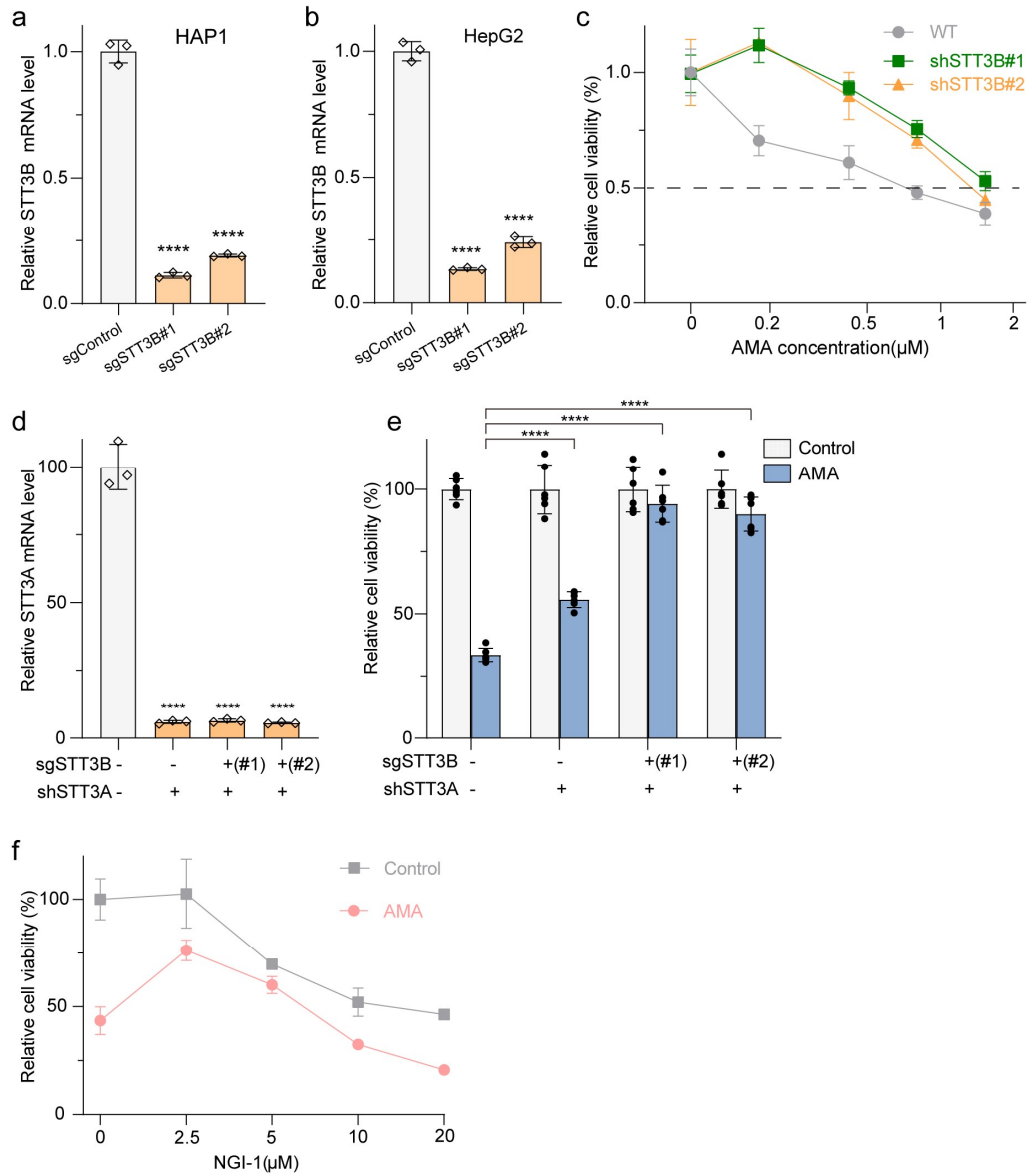

**Supplementary Figure 2. N-Glycan biosynthesis is essential for AMA-induced cell death.** **a-b** Relative *STT3B* mRNA level in *STT3B* knockout HAP1 (**a**) and HepG2 (**b**) cells (n = 3 biological replicates). \*\*\*\**p* < 0.0001. **c** WT and shSTT3B HepG2 cells were treated with vehicle or AMA for 72 h, and cell viability was determined by CCK8 assay (n = 3 biological replicates). **d-e** The combination of *STT3B* knockout and *STT3A* knockdown gave complete resistance to AMA in HepG2 cells. (**d**) The *STT3A* mRNA level of shSTT3A in sgSTT3B HepG2 cells (n = 3 biological replicates). \*\*\*\**p* < 0.0001. (**e**) Knockdown of *STT3A* with *STT3B* knockout confers complete resistance to AMA (5 μM) in HepG2 cell lines (n = 6 biological replicates). \*\*\*\**p* < 0.0001. **f** HAP1 cells were pre-treated with NGI for 12 h, and then treated with AMA (3 μM) for 48 h (n = 3

biological replicates). Data are presented as mean  $\pm$  S.D. and are representative of three independent experiments. The statistics were assessed using one-way ANOVA followed by Dunnett's multiple comparisons test. Source data are provided as a Source Data file.

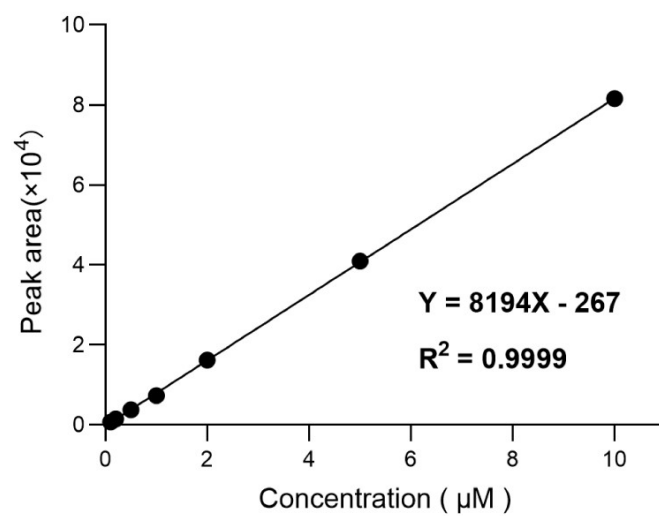

**Supplementary Figure 3. The calibration curve of AMA concentration (0.1-10 μM) and peak area.** The calibration curve showed a good linear relationship between AMA concentration (0.1-10 μM) and peak area, with  $R^2 = 0.9999$ . Source data are provided as a Source Data file.

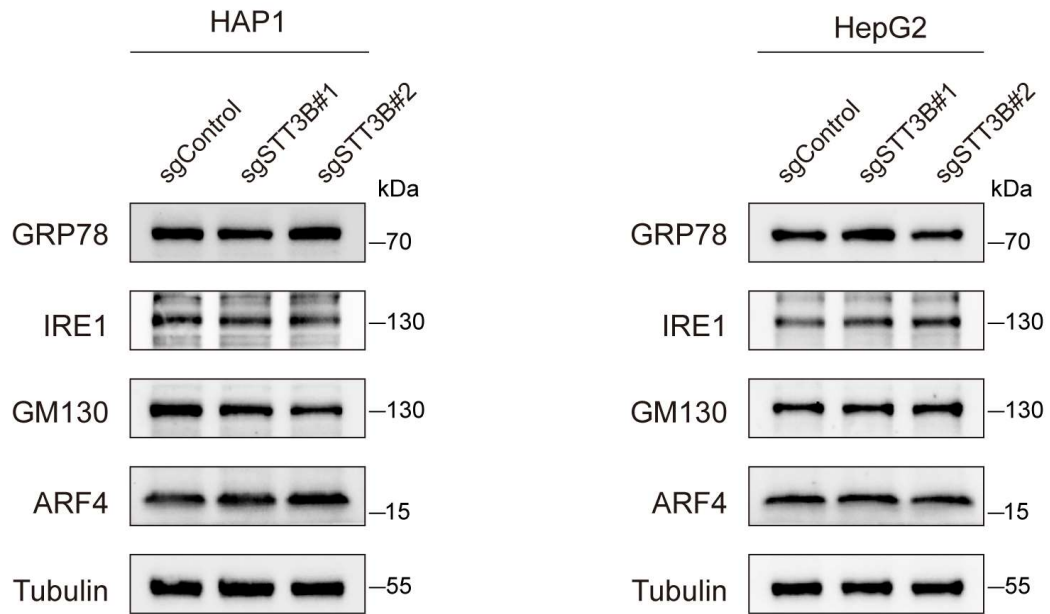

**Supplementary Figure 4. The knockout of *STT3B* did not cause a significant change in ER and Golgi stress markers.** Western blot analysis of stress response of ER (GRP78 and IRE1) and Golgi (GM130 and ARF4) in *STT3B* knockout cells. Source data are provided as a Source Data file.

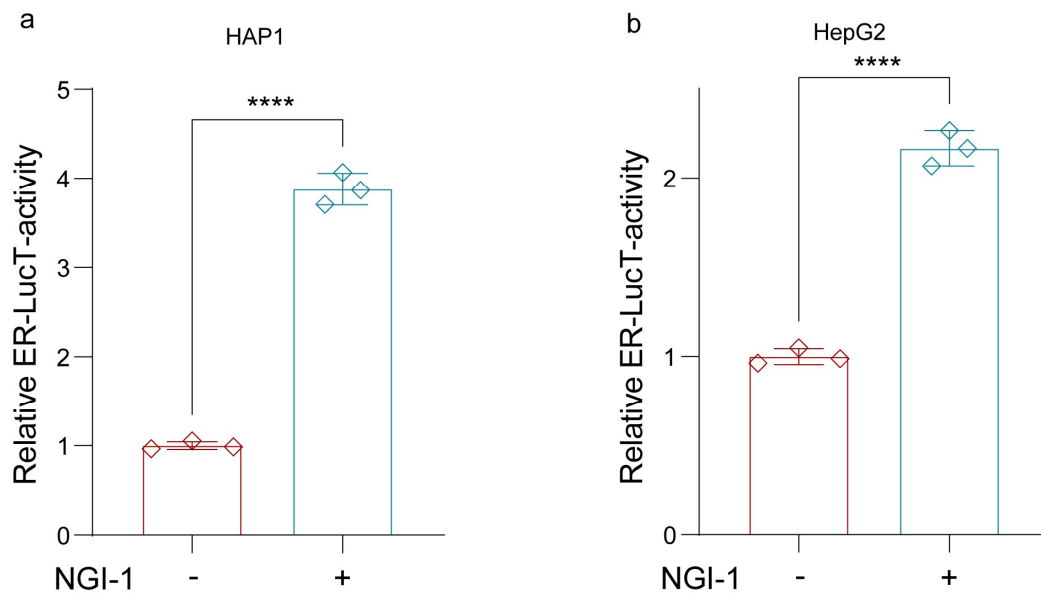

**Supplementary Figure 5. The effect of NGI-1 on disrupting N-linked glycosylation.**

ERLucT transfected HAP1 (a) and HepG2 (b) cells were treated with NGI-1 at 10  $\mu$ M and 20  $\mu$ M, respectively, and luciferase activity was measured (n = 3 biological replicates). \*\*\*\* $p$  < 0.0001. The statistics were assessed using a two-tailed unpaired  $t$  test. Data are presented as mean  $\pm$  S.D. and are representative of three independent experiments. Source data are provided as a Source Data file.

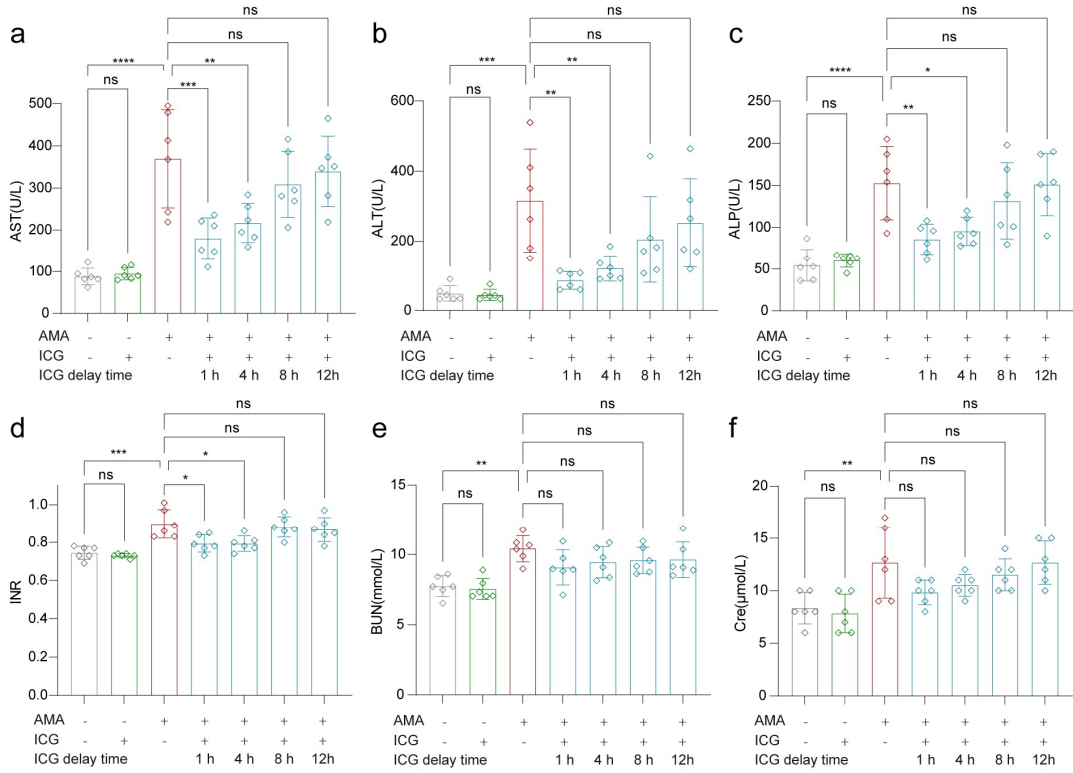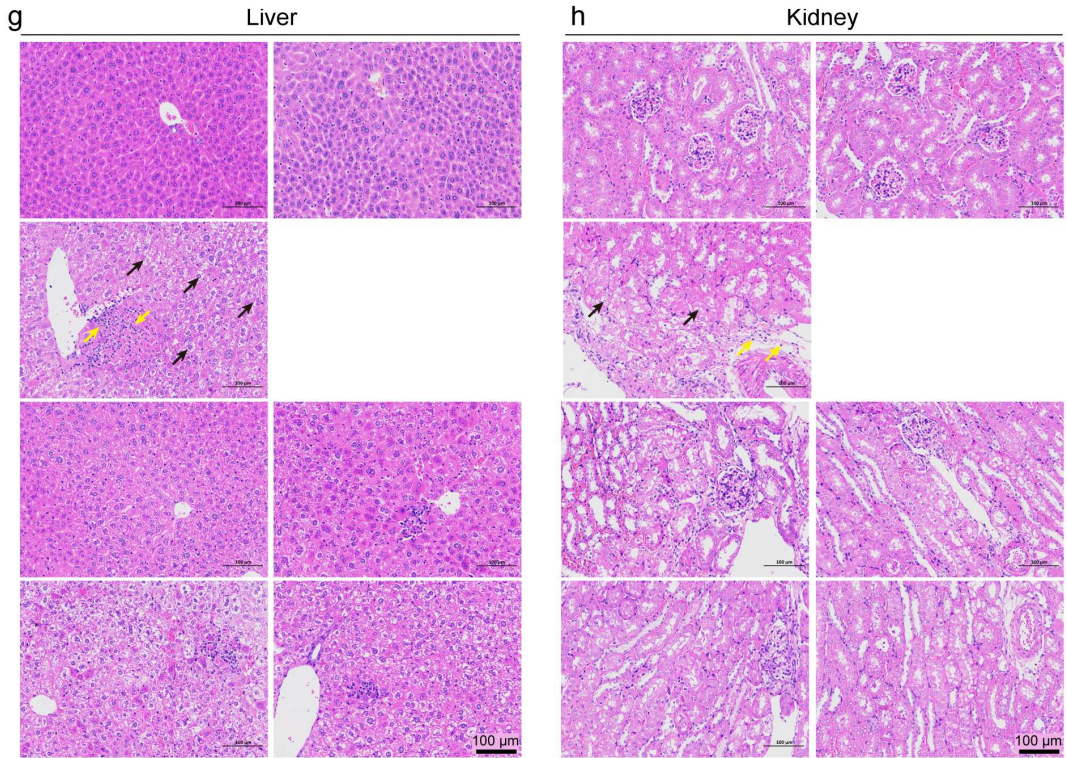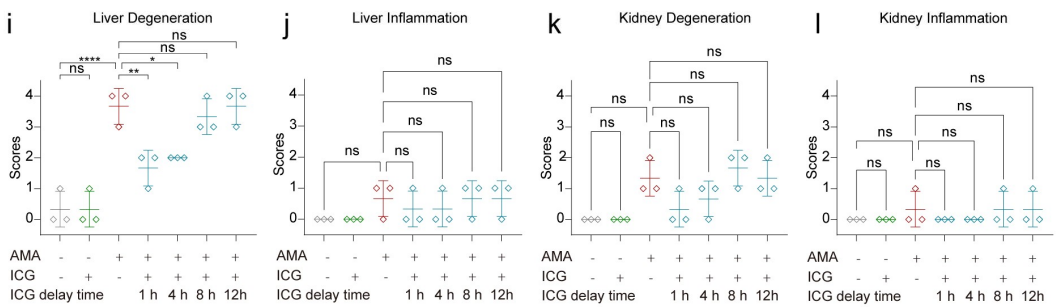



**Supplementary Figure 6. ICG is an effective antidote for AMA toxicity in mice. a-f** Plasma levels of AST, ALT, ALP, INR, BUN, Cre in mice with different treatments (n = 6 biological replicates). **(a)**  $^{ns}p > 0.9999$ ,  $^{****}p < 0.0001$ ,  $^{***}p = 0.0005$ ,  $^{**}p = 0.0067$ ,  $^{ns}p = 0.7106$ ,  $^{ns}p = 0.9865$ ; **(b)**  $^{ns}p > 0.9999$ ,  $^{***}p = 0.0002$ ,  $^{**}p = 0.0015$ ,  $^{*}p = 0.0095$ ,  $^{ns}p = 0.3460$ ,  $^{ns}p = 0.8754$ ; **(c)**  $^{ns}p = 0.9999$ ,  $^{****}p < 0.0001$ ,  $^{**}p = 0.0081$ ,  $^{*}p = 0.0341$ ,  $^{ns}p = 0.8868$ ,  $^{ns}p > 0.9999$ ; **(d)**  $^{ns}p = 0.9984$ ,  $^{***}p = 0.0001$ ,  $^{*}p = 0.0149$ ,  $^{*}p = 0.0149$ ,  $^{ns}p = 0.9972$ ,  $^{ns}p = 0.9428$ ; **(e)**  $^{ns}p = 0.9999$ ,  $^{**}p = 0.0011$ ,  $^{ns}p = 0.2863$ ,  $^{ns}p = 0.6525$ ,  $^{ns}p = 0.7902$ ,  $^{ns}p = 0.8318$ ; **(f)**  $^{ns}p = 0.9993$ ,  $^{**}p = 0.0072$ ,  $^{ns}p = 0.1764$ ,  $^{ns}p = 0.4676$ ,  $^{ns}p = 0.9393$ ,  $^{ns}p > 0.9999$ . **g-h** H&E staining of liver and kidney in mice with different treatments. Cell degeneration (black arrow) and inflammatory cells (yellow arrow) were shown. Scale bars are 100  $\mu$ m. **i-l** Pathological score of H&E staining of liver and kidney in different groups (n = 3 biological replicates). **(i)**  $^{ns}p > 0.9999$ ,  $^{****}p < 0.0001$ ,  $^{**}p = 0.0060$ ,  $^{*}p = 0.0241$ ,  $^{ns}p = 0.9850$ ,  $^{ns}p > 0.9999$ ; **(j)**  $^{ns}p > 0.9999$ ,  $^{ns}p = 0.6423$ ,  $^{ns}p = 0.9764$ ,  $^{ns}p = 0.9764$ ,  $^{ns}p > 0.9999$ ,  $^{ns}p > 0.9999$ ; **(k)**  $^{ns}p > 0.9999$ ,  $^{ns}p = 0.0564$ ,  $^{ns}p = 0.2270$ ,  $^{ns}p = 0.6423$ ,  $^{ns}p = 0.9764$ ,  $^{ns}p > 0.9999$ ; **(l)**  $^{ns}p > 0.9999$ ,  $^{ns}p = 0.9241$ ,  $^{ns}p = 0.9241$ ,  $^{ns}p = 0.9241$ ,  $^{ns}p > 0.9999$ ,  $^{ns}p > 0.9999$ . All data were represented as mean  $\pm$  S.D. The statistics were assessed using one-way ANOVA followed by Tukey's multiple comparisons test. Source data are provided as a Source Data file.

**Supplementary Table 1.** The various sequences used in this study.

| Primer sequences for amplifying sgRNA library |                                                            |
|-----------------------------------------------|------------------------------------------------------------|
| Sense                                         | TTGTGGAAAGGACGAAACACCG                                     |
| Antisense                                     | CCAATTCCCCTCCTTTCAAGACCT                                   |
| sequences used for gene validation            |                                                            |
| sgSTT3B#1                                     | CCAGGGTTGATGATAACCGC                                       |
| sgSTT3B#2                                     | AAGAAAGACACCCAAGTCGT                                       |
| sgNT                                          | GGATCTAGCTACCTCAAAG                                        |
| shSTT3B#1-F                                   | CCGGGCACTTCAGTTCACATACTATCTCGAGATAGTATGTGAACTGAAGTGCTTTTTG |
| shSTT3B#1-R                                   | AATTCAAAAAGCACTTCAGTTCACATACTATCTCGAGATAGTATGTGAACTGAAGTGC |
| shSTT3B#2-F                                   | CCGGGCAGTATCTGAGAGACCGATTCTCGAGAATCGGTCTCTCAGATACTGCTTTTTG |
| shSTT3B#2-R                                   | AATTCAAAAAGCAGTATCTGAGAGACCGATTCTCGAGAATCGGTCTCTCAGATACTGC |
| shSTT3A-F                                     | CCGGCGTCATAATACTCCAGAGGATCTCGAGATCCTCTGGAGTATTATGACGTTTTG  |
| shSTT3A-R                                     | AATTCAAAAACGTCATAATACTCCAGAGGATCTCGAGATCCTCTGGAGTATTATGACG |
| Real-time RT-PCR primer                       |                                                            |
| STT3B-F                                       | AGTAGGTGGTACTGTTTACCCAG                                    |
| STT3B-R                                       | AAGTTGGTGCAAGGAACACAC                                      |
| STT3A-F                                       | GAAGCAACAGGATTCCACCTACC                                    |
| STT3A-R                                       | CAATGGACGGAGAAGAGTAGGC                                     |
| GAPDH-F                                       | GGAGCGAGATCCCTCCAAAAT                                      |
| GAPDH-R                                       | GGCTGTTGTCATACTTCTCATGG                                    |
