# Supplementary material for: Identification of indocyanine green as a STT3B inhibitor against mushroom α-amanitin cytotoxicity
Source: PubMed Central journal article supplement (PMC10188588; doi:10.1038/s41467-023-37714-3), 2023-05-16
Supplement: 41467_2023_37714_MOESM2_ESM.pdf [file 41467_2023_37714_MOESM2_ESM.pdf]

### **Description of Additional Supplementary Files**

File Name: Supplementary Data 1.

Description: The list of gene hits and scores from the genome-wide CRISPR screen against  $\alpha$ -amanitin toxicity.

File Name: Supplementary Data 2.

Description: The results of molecular docking between STT3B and FDA-approved drug libraries.
